# Supplementary material for: Application of dandelion-like Sm 2 O 3 /Co 3 O 4 /rGO in high performance supercapacitors
Source: Royal Society of Chemistry journal article supplement (doi:10.1039/d3ra06352f), 2024-01-01
Supplement: d3ra06352f1.pdf [file d3ra06352f1.pdf]

## Supporting Information

### Application of dandelion-like $\text{Sm}_2\text{O}_3/\text{Co}_3\text{O}_4/\text{rGO}$ in high performance supercapacitors

#### S1: Synthesis of $\text{Sm}_2\text{O}_3/\text{Co}_3\text{O}_4/\text{NF}$ composite electrode material

0.75 mmol (0.333 g) of  $\text{Sm}(\text{NO}_3)_3 \cdot 6\text{H}_2\text{O}$ , 0.75 mmol (0.218 g) of  $\text{Co}(\text{NO}_3)_2 \cdot 6\text{H}_2\text{O}$ , and 1 mmol (0.060 g) of urea were added to 15 mL of distilled water and stirred vigorously with a magnetic stirrer for 1 h. The mixture was then transferred to a 25 mL tetrafluoroethylene lined autoclave containing a clean nickel foam (NF), and the reaction was carried out at a high temperature of 180 °C for 9 h. After completion of the reaction, the autoclave cooled to room temperature. The  $\text{Sm}_2\text{O}_3/\text{Co}_3\text{O}_4/\text{NF}$  precursor was repeatedly washed with deionized water and ethanol. The washed precursor was then dried at 60 °C for 8 h in an oven. Finally, the solid was annealed at 300 °C for 2 h in a muffle furnace to obtain the  $\text{Sm}_2\text{O}_3/\text{Co}_3\text{O}_4/\text{NF}$  composite electrode material.

#### S2: Synthesis of $\text{Co}_3\text{O}_4/\text{rGO}/\text{NF}$ composite electrode material

Dissolve 0.75 mmol of  $\text{Co}(\text{NO}_3)_2 \cdot 6\text{H}_2\text{O}$  and 1 mmol of urea in 7.5 mL of deionized water. Stir the mixture using a magnetic stirrer for 1 h to form a homogeneous solution. Then, 7.5 mL of a graphene oxide suspension with a concentration of 2  $\text{mg} \cdot \text{mL}^{-1}$  was added to the solution, followed by stirring for an additional 1 h. The treated NF and the mixed solution were then placed in a polytetrafluoroethylene high-pressure reactor and reacted at 180 °C for 9 h in an oven. The precursor was washed with ethanol and deionized water, followed by drying at 60 °C for 8 h. Finally, anneal the sample in a muffle furnace at 300 °C for 2 h to produce the  $\text{Co}_3\text{O}_4/\text{rGO}/\text{NF}$  composite electrode material.

#### S3: Synthesis of $\text{Sm}_2\text{O}_3/\text{rGO}/\text{NF}$ composite electrode material

A homogeneous solution was obtained by dissolving 0.75 mmol  $\text{Sm}(\text{NO}_3)_3 \cdot 6\text{H}_2\text{O}$  and 1 mmol urea in 7.5 ml distilled water and stirring magnetically for 1 h. The graphene solution (7.5 mL, 2  $\text{mg} \cdot \text{mL}^{-1}$ ) was mixed with the above solution and stirred

vigorously for 1 h. The cleaned NF was transferred with the solution into a 25 mL tetrafluoroethylene-lined autoclave, heated at 180 °C for 9 h, and then cooled naturally to room temperature. The  $\text{Sm}_2\text{O}_3/\text{rGO}/\text{NF}$  precursor was then washed several times with ethanol and distilled water and dried at 60 °C for 8 h. The  $\text{Sm}_2\text{O}_3/\text{rGO}/\text{NF}$  precursor was then annealed in a muffle furnace at 300 °C for 2 h to obtain the  $\text{Sm}_2\text{O}_3/\text{rGO}/\text{NF}$  composite electrode material.

#### **S4: Synthesis of rGO/NF composite electrode material**

0.75 mmol of  $\text{Sm}(\text{NO}_3)_3 \cdot 6\text{H}_2\text{O}$  and 1 mmol of urea were mixed in 7.5 ml of distilled water. The solution and the cleaned nickel foam were then transferred to a 25 mL tetrafluoroethylene-lined autoclave and heated at 180 °C for 9 h. The rGO/NF precursor was washed with ethanol and deionized water and then dried in an oven at 60 °C for 8 h. Finally, it was annealed at 300 °C for 2 h in a muffle furnace to obtain the rGO/NF composite electrode material.

## **Results and discussion**

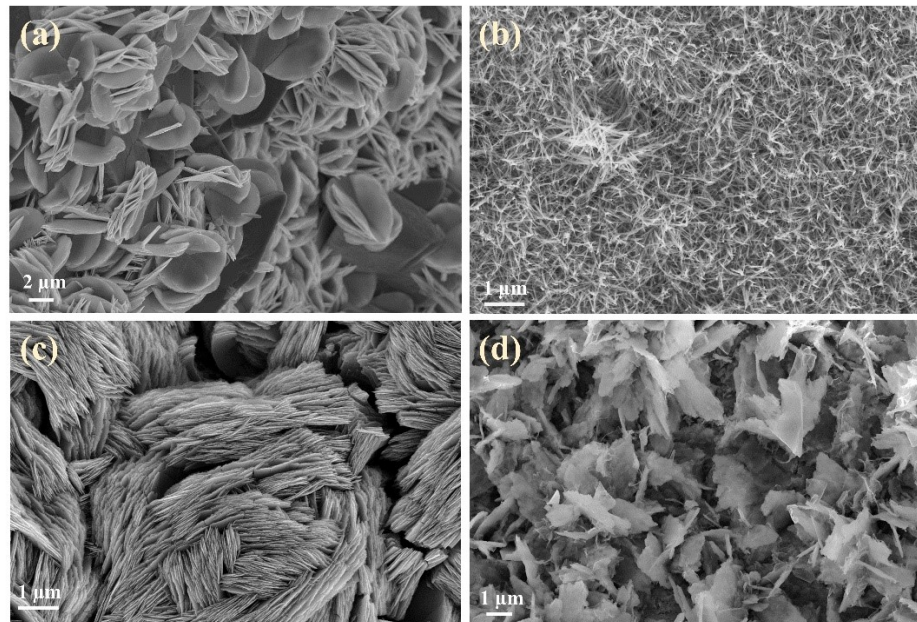

**Fig. S1 The SEM images of various materials: (a)  $\text{Co}_3\text{O}_4/\text{NF}$ , (b) CGN, (c)  $\text{Sm}_2\text{O}_3/\text{NF}$ , and (d) SCN**

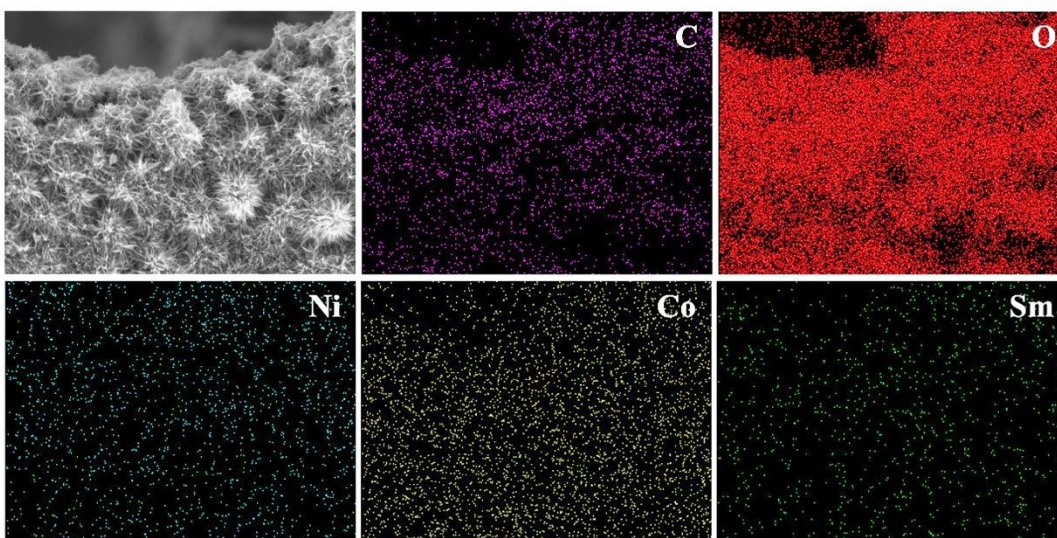

**Fig. S2** EDS elemental mapping images of the composite (C, O, Ni, Co, and Sm)

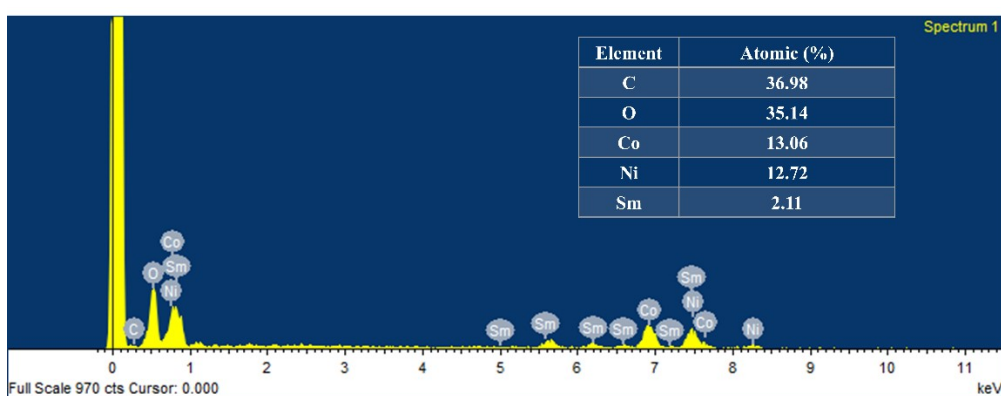

**Fig. S3** EDS of SCGN

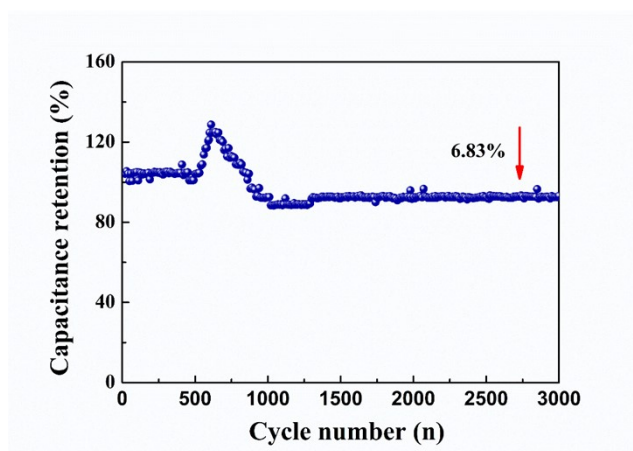

**Fig. S4** The capacitance retention at a current density of  $10 \text{ A} \cdot \text{g}^{-1}$  for 3000 cycles.

Table S1 Comparison of electrochemical performances of SCGN electrode in our work with previous.

| Materials                                                                         | Specific capacitance                                 | capacitance retention (%)             | Stability (%)            | Current density      | Refs.        |
|-----------------------------------------------------------------------------------|------------------------------------------------------|---------------------------------------|--------------------------|----------------------|--------------|
| Co <sub>3</sub> O <sub>4</sub> @MnO <sub>2</sub> composites                       | 671 F·g <sup>-1</sup><br>at 1.0 A·g <sup>-1</sup>    | 84%<br>(1 to 10 A·g <sup>-1</sup> )   | 95.2%<br>(2000 cycles)   | 1 A·g <sup>-1</sup>  | 1            |
| Co <sub>3</sub> O <sub>4</sub> -CeO <sub>2</sub> composites                       | 1288.3F·g <sup>-1</sup><br>at 2.5 A·g <sup>-1</sup>  | 80.4%<br>(1 to 6 A·g <sup>-1</sup> )  | 98%<br>(6000 cycles)     | 4 A·g <sup>-1</sup>  | 2            |
| Co <sub>3</sub> O <sub>4</sub> /NF<br>composites                                  | 2053.1 F·g <sup>-1</sup><br>at 1.0 A·g <sup>-1</sup> | 54.2%<br>(1 to 40·A g <sup>-1</sup> ) | 93.3%<br>(10000 cycles)  | 2 A·g <sup>-1</sup>  | 3            |
| SmN-RGO composites                                                                | 268 F·g <sup>-1</sup><br>at 2.0 A·g <sup>-1</sup>    | ----                                  | 99%<br>(4000 cycles)     | 2 A·g <sup>-1</sup>  | 4            |
| SmWO <sub>4</sub><br>composites                                                   | 326 F·g <sup>-1</sup><br>at 2.0 mV·s <sup>-1</sup>   | 47%<br>(1 to 16 A·g <sup>-1</sup> )   | 89.9%<br>(3000 cycles)   | 20A·g <sup>-1</sup>  | 5            |
| SmCoO <sub>3</sub> /rGO composite                                                 | 69.3 F·g <sup>-1</sup><br>at 1.0 A g <sup>-1</sup>   | ----                                  | 74.28%<br>(15000 cycles) | 1 A·g <sup>-1</sup>  | 6            |
| Sm <sub>2</sub> O <sub>3</sub> /Co <sub>3</sub> O <sub>4</sub> /rGO<br>composites | 3448 F·g <sup>-1</sup><br>at 1 A·g <sup>-1</sup>     | 44.8%<br>(1 to 20 A·g <sup>-1</sup> ) | 93.2%<br>(3000 cycles)   | 10 A·g <sup>-1</sup> | This<br>work |

1. H. Che, Y. Lv, A. Liu, J. Mu, X. Zhang and Y. Bai, *Ceramics International*, 2017, **43**, 6054–6062.
2. C. Wei, K. Liu, J. Tao, X. Kang, H. Hou, C. Cheng and D. Zhang, *Chem Asian J*, 2018, **13**, 111–117.
3. G. Wei, L. Yan, H. Huang, F. Yan, X. Liang, S. Xu, Z. Lan, W. Zhou and J. Guo, *Applied Surface Science*, 2021, **538**, 14932.
4. A. S. Dezfuli, M. R. Ganjali and H. R. Naderi, *Applied Surface Science*, 2017, **402**, 245–253.
5. A. Sobhani-Nasab, H. Naderi, M. Rahimi-Nasrabadi and M. R. Ganjali, *Journal of Materials Science: Materials in Electronics*, 2017, **28**, 8588–8595.
6. M. Isacfranklin, R. Yuvakkumar, G. Ravi, S. I. Hong, D. Velauthapillai, M. Thambidurai, C. Dang, T. S. Algarni and A. M. Al-Mohaimeed, *Carbon*, 2021, **172**, 613–623.

## References
